# Supplementary material
Source: PubMed Central journal article supplement (PMC5548091)
Supplement: NIHMS879125-supplement-Supplement.pdf [file NIHMS879125-supplement-Supplement.pdf]

**On-line Table 1: Clinical details and MRI findings in the PMG cohort**

| No. | Age (yr)/Sex | Clinical Details          |                                           |                                           |                           |                                                                                    |                   |                                                           |                     |                |                | MRI Findings    |                        |                                                                                                                                        |                                                                                                                                        |                                                                                                     |                                                                                                       |  |  |  |  |
|-----|--------------|---------------------------|-------------------------------------------|-------------------------------------------|---------------------------|------------------------------------------------------------------------------------|-------------------|-----------------------------------------------------------|---------------------|----------------|----------------|-----------------|------------------------|----------------------------------------------------------------------------------------------------------------------------------------|----------------------------------------------------------------------------------------------------------------------------------------|-----------------------------------------------------------------------------------------------------|-------------------------------------------------------------------------------------------------------|--|--|--|--|
|     |              | Cognitive Level           | Early Development                         | Neurologic Examination                    | Age at Seizure Onset (yr) | Seizure Type/Frequency                                                             | Epilepsy Syndrome | EEG at the Time of Study                                  | Topographic Pattern |                | PMG Character  |                 | Vascular Abnormalities |                                                                                                                                        | Associated Abnormalities                                                                                                               |                                                                                                     |                                                                                                       |  |  |  |  |
|     |              |                           |                                           |                                           |                           |                                                                                    |                   |                                                           | 3T/7T               | 7T             | 3T             | 7T              | 3T                     | 7T                                                                                                                                     | 3T                                                                                                                                     | 7T                                                                                                  |                                                                                                       |  |  |  |  |
| 1   | 2/F          | Mild impairment           | Severe language delay                     | Mild L hemiparesis                        | 4                         | CPS/remission since 5 yr                                                           | Focal             | R T sharp waves, diffuse SW during HPN                    | Diffuse             | Bilateral/sym  | Bilateral/sym  | Delicate/coarse | Undulated profile      | None                                                                                                                                   | Increased No. and dilation of superficial veins in PMG cortex                                                                          | Bilateral hippocampal malrotation, ventricular dilation                                             | Same as seen at 3T                                                                                    |  |  |  |  |
| 2   | 33/M         | Normal                    | Normal                                    | Normal                                    | 16                        | CPS/monthly                                                                        | Focal             | L T SW with possible contralateral spreading              | Perisylvian         | Unilateral     | Bilateral/asym | Coarse          | Undulated profile      | None                                                                                                                                   | Increased No. and dilation of superficial veins in PMG cortex                                                                          | None                                                                                                | None                                                                                                  |  |  |  |  |
| 3   | 21/F         | Normal                    | Mild language delay                       | Opercular syndrome                        | 15                        | CPS/monthly                                                                        | Focal             | Bilateral C T SW                                          | Perisylvian         | Bilateral/asym | Bilateral/asym | Coarse          | Undulated profile      | None                                                                                                                                   | Increased No. and dilation of superficial veins in PMG cortex                                                                          | None                                                                                                | None                                                                                                  |  |  |  |  |
| 4   | 33/M         | Normal                    | Normal                                    | Normal                                    | 16                        | CPS/yearly                                                                         | Focal             | R hemisphere spikes with possible contralateral spreading | Perisylvian         | Unilateral     | Unilateral     | Delicate/coarse | Undulated profile      | None                                                                                                                                   | Increased No. and dilation of superficial veins in PMG cortex                                                                          | R T NH, cavum vergense, ventricular dilation                                                        | Same as seen at 3T                                                                                    |  |  |  |  |
| 5   | 24/M         | Moderate impairment       | Mild motor delay, moderate language delay | Mild R hemiparesis                        | 4                         | Focal, atypical absences since 4 yr/remission since 6 yr                           | ESES              | L hemisphere spikes with possible contralateral spreading | Perisylvian         | Unilateral     | Bilateral/asym | Coarse          | Undulated profile      | L intraorbital cavernous hemangiomas, L soft-tissue hemangioma, R Sylvian vein hypertrophy, mesial temporal medullary vein hypertrophy | L intraorbital cavernous hemangiomas, L soft-tissue hemangioma, R Sylvian vein hypertrophy, mesial temporal medullary vein hypertrophy | L hippocampal atrophy                                                                               | Same as seen at 3T                                                                                    |  |  |  |  |
| 6   | 21/M         | Borderline functioning    | Mild language delay                       | Dysarthria, dyspraxia, mild R hemiparesis | 1                         | Focal seizures 1-7 yr, negative myoclonic seizures since 6 yr/remission since 9 yr | Focal, ESES       | Vertex spikes                                             | Perisylvian         | Unilateral     | Bilateral/asym | Delicate/coarse | Undulated profile      | None                                                                                                                                   | Increased No. and dilation of superficial veins in PMG cortex                                                                          | Absence of septum pellucidum, bilateral ventricular dilation                                        | Same as seen at 3T                                                                                    |  |  |  |  |
| 7   | 53/F         | Normal                    | Normal                                    | Mild L hemiparesis                        | 9                         | CPS/weekly                                                                         | Focal             | Bilateral C T spikes and diffuse SW                       | Perisylvian         | Unilateral     | Unilateral     | Coarse          | Undulated profile      | None                                                                                                                                   | Increased No. and dilation of superficial veins in PMG cortex                                                                          | L hippocampal dysplasia, R TO NH                                                                    | Same as seen at 3T                                                                                    |  |  |  |  |
| 8   | 26/F         | Mild impairment           | Mild motor delay                          | Awkwardness, dysarthria, dyspraxia        | 8                         | CPS/remission since 10 yr                                                          | Focal             | Diffuse SW                                                | Perisylvian         | Unilateral     | Unilateral     | Coarse          | Undulated profile      | None                                                                                                                                   | Increased No. and dilation of superficial veins in PMG cortex                                                                          | R Sylvian fissure and folding of the R Sylvian fissure and frontal opercular sulci, R and L T gyrus | Abnormal thickening and folding of the R Sylvian fissure and frontal opercular sulci, R and L T gyrus |  |  |  |  |
| 9   | 39/F         | Mild cognitive impairment | Mild motor delay, moderate language delay | Dysarthria, dyspraxia, mild R hemiparesis | 0.7                       | SPS/monthly                                                                        | Focal             | Bilateral PO spikes                                       | Perisylvian         | Bilateral/asym | Bilateral/asym | Coarse          | Not detectable         | None                                                                                                                                   | Increased No. and dilation of superficial veins in PMG cortex                                                                          | R P open-lip SCZ, absent septum pellucidum, L bilateral ventricular dilation                        | R P open-lip SCZ, absent septum pellucidum, L bilateral ventricular dilation                          |  |  |  |  |
| 10  | 28/F         | Normal                    | Mild motor delay                          | Mild L hemiparesis                        | 17                        | Focal/remission since 17 yr                                                        | Focal             | Normal                                                    | Perisylvian         | Unilateral     | Bilateral/asym | Delicate/coarse | Undulated profile      | None                                                                                                                                   | Increased No. and dilation of superficial veins in PMG cortex                                                                          | None                                                                                                | None                                                                                                  |  |  |  |  |

**Note:**—Asym indicates asymmetric; C, central; CPS, complex partial seizures; EEG, electroencephalography; ESES, electrical status epilepticus during sleep; HPN, hyperventilation; L, left; NH, nodular heterotopia; O, occipital; P, parietal; PMG, polymicrogyria; R, right; SCZ, schizencephaly; SPS, simple partial seizures; Sym, symmetric; SW, spike waves; T, temporal.

**On-line Table 2: Synopsis of the parameters of the 3T and 7T imaging techniques used<sup>a</sup>**

|    | Sequence                       |    | TR (ms) | TE (ms)                                 | TI (ms) | Voxel size (mm <sup>3</sup> ) | FA  | RBW (kHz) | FOV (mm)  | Sections/Partitions | Section Thickness (mm) | Scan Time   |
|----|--------------------------------|----|---------|-----------------------------------------|---------|-------------------------------|-----|-----------|-----------|---------------------|------------------------|-------------|
|    | Type                           |    |         |                                         |         |                               |     |           |           |                     |                        |             |
| 3T | T1WI FSPGR                     | 3D | 6.6     | 2.8                                     | 450     | 1 × 1 × 1                     | 13° | 31.3      | 256       | 156                 | 1                      | 4 min, 12 s |
|    | T2 FLAIR                       | 2D | 9027    | 155                                     | 2250    | 0.75 × 0.75 × 4               | 90° | 50        | 240       | 24                  | 4                      | 5 min, 50 s |
|    | T2WI FSE                       | 2D | 2840    | 78.8                                    | —       | 0.75 × 0.75 × 4               | 90° | 62.5      | 240       | 24                  | 4                      | 2 min, 45 s |
|    | White matter-suppressed FSE-IR | 2D | 5000    | 39.5                                    | 350     | 0.94 × 0.94 × 2.5             | 90° | 31.2      | 240 × 180 | 30                  | 2.5                    | 5 min, 16 s |
| 7T | T1WI FSPGR                     | 3D | 6.3     | 2.3                                     | 450     | 1 × 1 × 1                     | 12° | 50        | 224       | 96                  | 1                      | 5 min, 47 s |
|    | SWAN                           | 3D | 54.1    | 5.6, 12.0, 18.3, 24.7, 31.1, 37.5, 43.9 | —       | 0.5 × 0.5 × 1                 | 15° | 50        | 224       | 66                  | 1                      | 9 min, 38 s |
|    | T2*WI targeted dual-echo GRE   | 2D | 500     | 10, 20                                  | —       | 0.25 × 0.25 × 2               | 30° | 31.25     | 112       | 15                  | 2                      | 7 min, 32 s |
|    | T2WI FSE                       | 2D | 6000    | 87                                      | —       | 0.5 × 0.5 × 2                 | 90° | 20.83     | 224       | 10                  | 2                      | 5 min       |
|    | Gray-white matter TBE FSE-IR   | 2D | 4875    | 7.9                                     | 700     | 0.5 × 0.5 × 2                 | 90° | 62.5      | 224       | 10                  | 2                      | 8 min, 18 s |
|    |                                |    |         |                                         |         |                               |     |           |           |                     |                        |             |

**Note:**—FA indicates flip angle; —, not applicable; RBW, receiver bandwidth.

<sup>a</sup> The final SWAN image was obtained by averaging the images obtained at each TE.

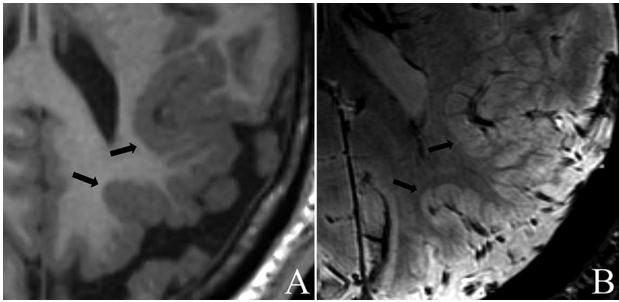

**ON-LINE FIG 1.** A and B, Patient 2. Comparison of 3T axial 3D FSPGR (A) and 7T axial 3D SWAN (B) images. A, A coarse, thick, and bumpy polymicrogyric cortex in the left parietal lobe (*arrows*). B, A pattern with a thinner cortex and higher periodicity of the microgyri, which are tightly packed.

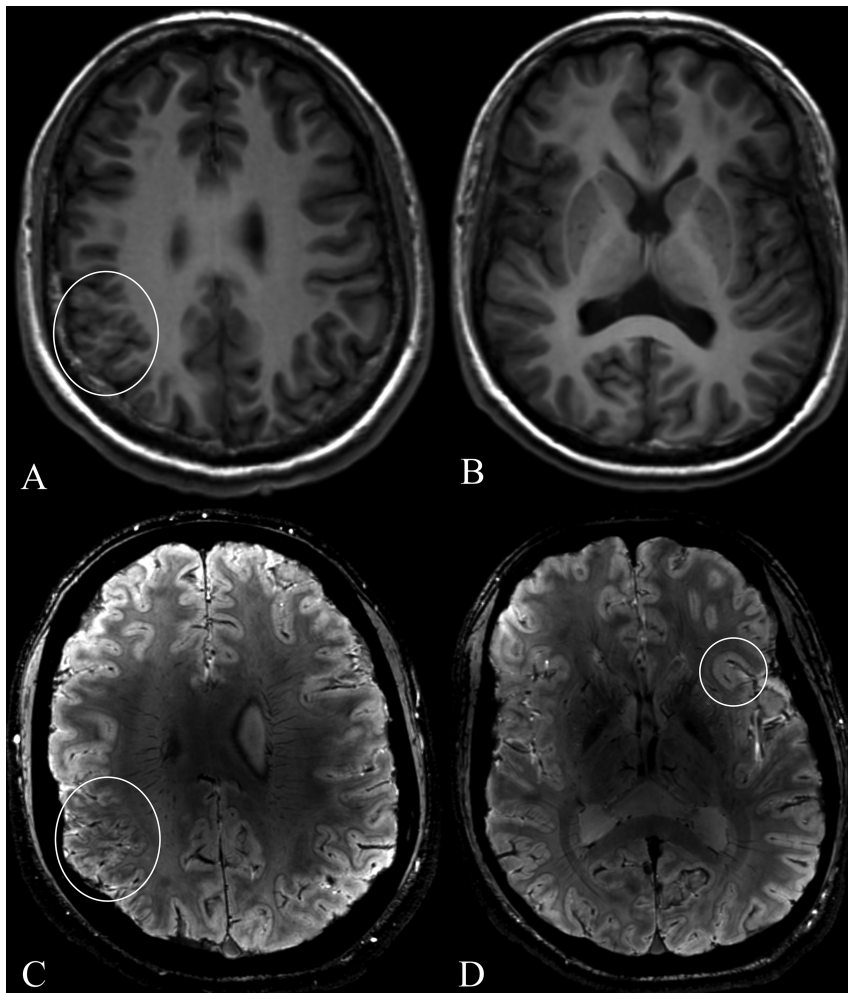

**ON-LINE FIG 2.** Patient 6. 3T axial 3D FSPGR (A and B) and 7T axial 3D SWAN (C and D) images. A, 3T FSPGR shows unilateral polymicrogyria involving the supramarginal gyrus and the lateral sulcus of the right parietal lobe (*white circle*). B, 3T FSPGR at a lower level does not show any relevant abnormality. C, 7T SWAN confirms with high detail the unilateral polymicrogyria in the supramarginal gyrus and the lateral sulcus of the right parietal lobe (*white circle*). D, 7T SWAN imaging discloses abnormal cortical infolding at the level of the left frontal operculum (*white circle*) with respect to 3T FSPGR images.

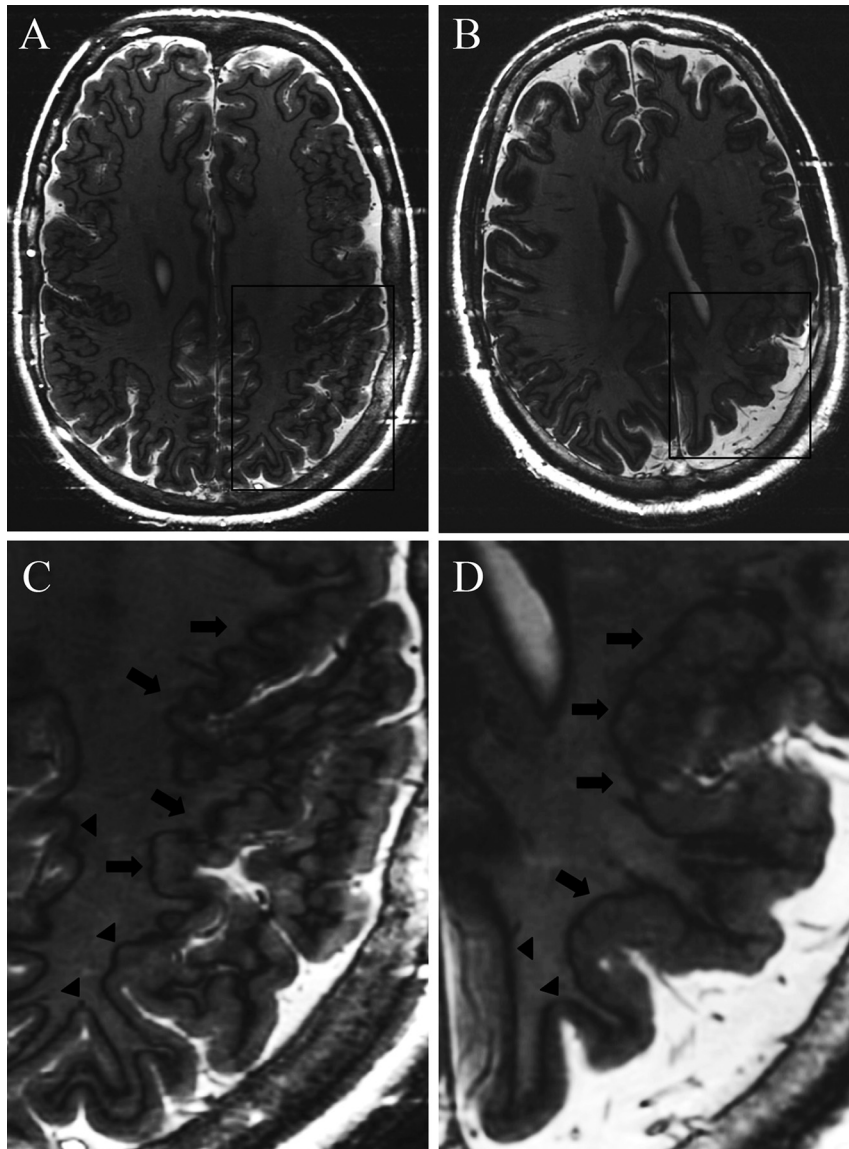

**ON-LINE FIG 3.** Patients 1 (A and magnified C) and 2 (B and magnified D). 7T axial 2D TBE FSE-IR. TBE images show a hypointense line along the gray-white matter interface, which provides a better definition of the polymicrogyric border and distinction of the normal (*arrowheads*) versus polymicrogyric cortex (*arrows*).

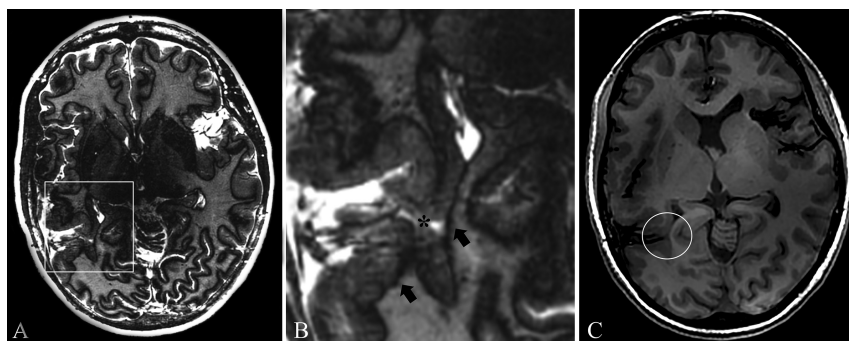

**ON-LINE FIG 4.** Patient 9. 7T axial 2D FSE-IR TBE (A, magnified in B) and 3D FSPGR (C) images. TBE imaging in A enhances detection of the borders of the polymicrogyric cortex and discloses a cleft, with open lips in its most superficial aspect and closed lips in its deepest aspect, adjacent to the wall of the occipital horn. The magnified image B shows the thickened and irregular gray matter that reaches the ventricle (*arrows*) and the cleft (*asterisk*). C, FSPGR image, acquired 1 mm above the TBE image, shows a small open-lipped schizencephalic cleft with separated lips (*white circle*).
